# Supplementary material
Source: PubMed Central journal article supplement (PMC4050605)
Supplement: 1321884111_pnas.201321884SI.pdf [file 1321884111_pnas.201321884SI.pdf]

# Supporting Information

Twu et al. 10.1073/pnas.1321884111

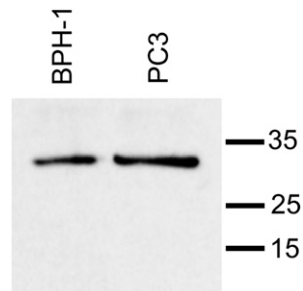

**Fig. S1.** Immunoblot shows that male benign prostate hyperplasia (BPH-1) and prostate cancer (PC3) cells express the macrophage migration inhibitory factor receptor CD74. Whole-cell extracts of the cell lines were subjected to SDS/PAGE, blotted, and reacted with an anti-CD74 antibody.

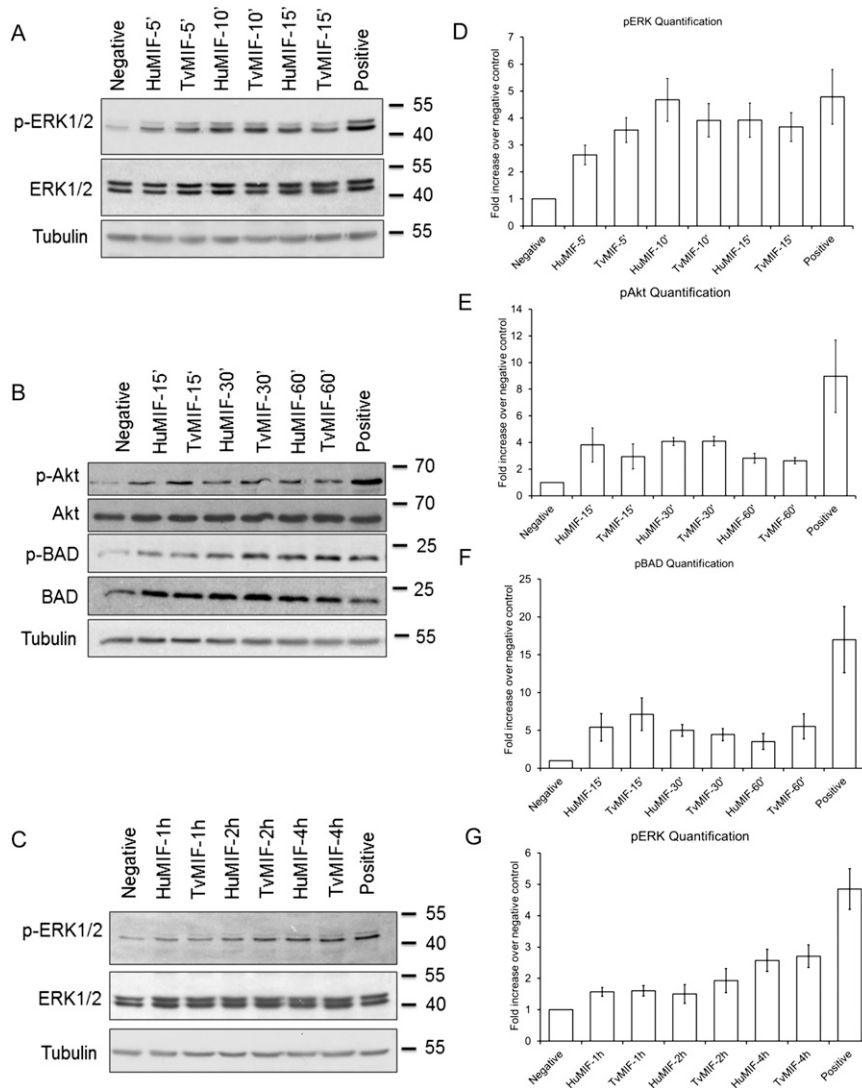

**Fig. S2.** (A) Serum-starved BPH-1 cells were exposed to 1 ng/mL (80 pM) endotoxin-free *Trichomonas vaginalis* macrophage migration inhibitory factor (TvMIF) or human MIF (HuMIF) for 5, 10, or 15 min and probed to detect phosphorylated-ERK Thr202/Tyr204 (p-ERK1/2), total ERK1/2 (ERK1/2), and  $\beta$ -tubulin (Tubulin) loading control. (B) Serum-starved BPH-1 cells were exposed to 1 ng/mL endotoxin-free TvMIF or HuMIF for 15, 30, or 60 min and probed to detect phosphorylated Akt (p-Akt), total Akt (Akt), Bcl-2-associated death promoter (BAD) phosphorylated at ser136 (p-BAD), total BAD (BAD), and  $\beta$ -tubulin loading control. (C) Serum-starved PC3 cells were exposed to 1 ng/mL endotoxin-free TvMIF or HuMIF for 1, 2, or 4 h and probed to detect p-ERK1/2, ERK1/2, and  $\beta$ -tubulin loading control. (Right) Quantifications of mean fold increase of p-ERK1/2 levels (D) p-Akt (E), or p-BAD induction (F) in BPH-1 cells exposed to 1 ng/mL TvMIF or HuMIF from three independent experiments (two exposures per experiment)  $\pm$  SEM. (G) Mean fold increase from quantification of p-ERK1/2 levels from PC3 cells exposed to 1 ng/mL TvMIF or HuMIF from three independent experiments (two exposures per experiment)  $\pm$  SEM.

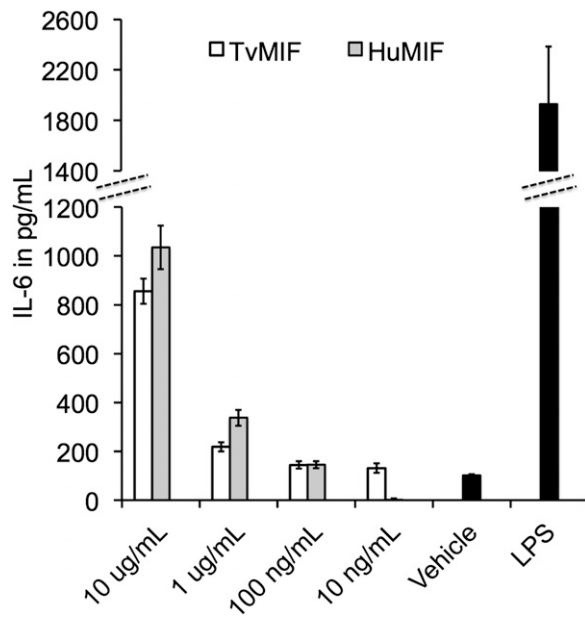

**Fig. S3.** IL-6 secretion from human monocytes in response to MIF. Data shown are representative of two donors. Data are the mean of triplicates per one assay  $\pm$  SEM.
